# Supplementary material for: Diagnostic Coding Intensity among a Pneumonia Inpatient Cohort Using a Risk-Adjustment Model and Claims Data: A U.S. Population-Based Study
Source: MDPI journal article supplement (doi:10.3390/diagnostics12061495), 2022-06-19
Supplement: s1 [file s1]

## Supplementary Materials

| <b>Figures</b>                                                                                                             | <b>Page(s)</b> |
|----------------------------------------------------------------------------------------------------------------------------|----------------|
| S1. Histogram of the outcome additional diagnoses across patient-visits                                                    | 2              |
| S2. Histograms for the covariate length of stay                                                                            | 3              |
| S3. Proportion of primary payor by patient race                                                                            | 4              |
| S4. Fitted spline between log-transformed length of stay and expected number of additional diagnoses                       | 5              |
| S5. Distribution of excess coding intensity                                                                                | 6              |
| S6. Effect plot of excess coding intensity for urban and rural facilities                                                  | 7              |
| S7. Effect plot of excess coding intensity by facility ownership status                                                    | 8              |
| S8. Effect plot of excess coding intensity by facility teaching status                                                     | 9              |
| S9. Effect plot of excess coding intensity by facility academic status                                                     | 10             |
| S10. Effect plot of excess coding intensity by facility size (i.e., bed capacity)                                          | 11             |
| S11. Effect plot of excess coding intensity by U.S. Census Bureau regional division                                        | 12             |
| S12. Effect plot of excess coding intensity by facility case mix index (CMI)                                               | 13             |
| S13. Heat map of average adjusted excess coding intensity across admission month and U.S. Census Bureau regional division. | 14             |
| S14. Dot plot of sorted average adjusted excess coding intensity (unexplained excess coding intensity) by facility.        | 15             |

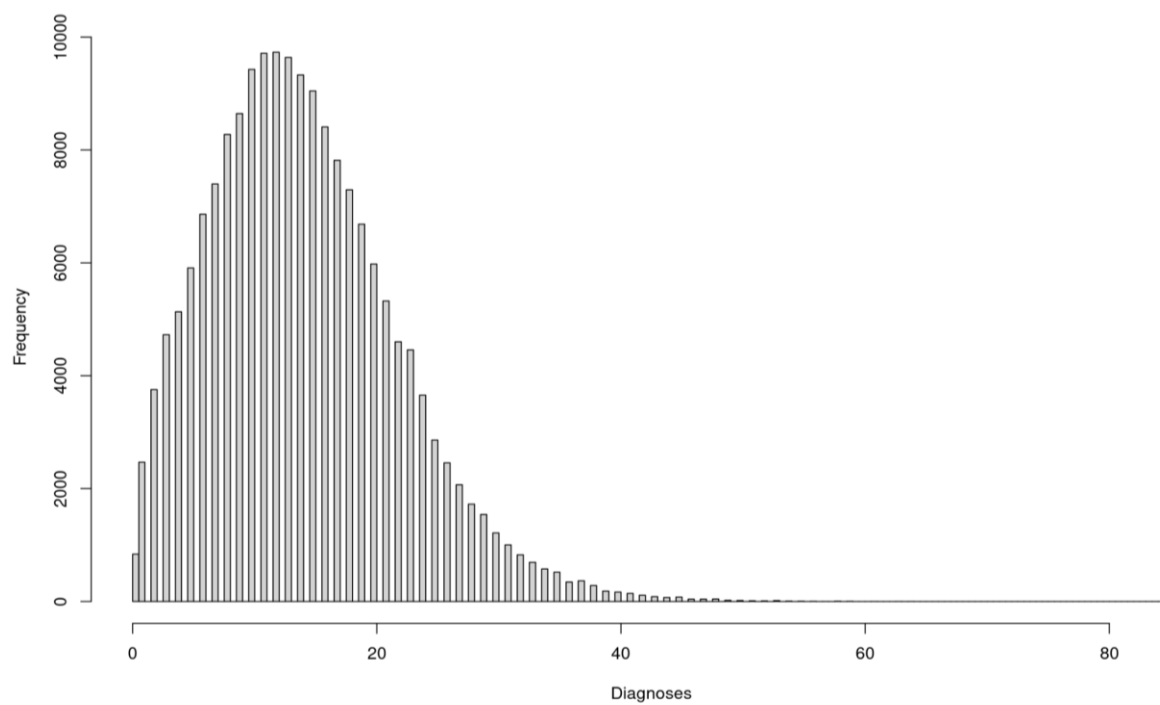

**Figure S1.** Histogram of additional diagnoses across patient-visits.

## Supplementary Materials

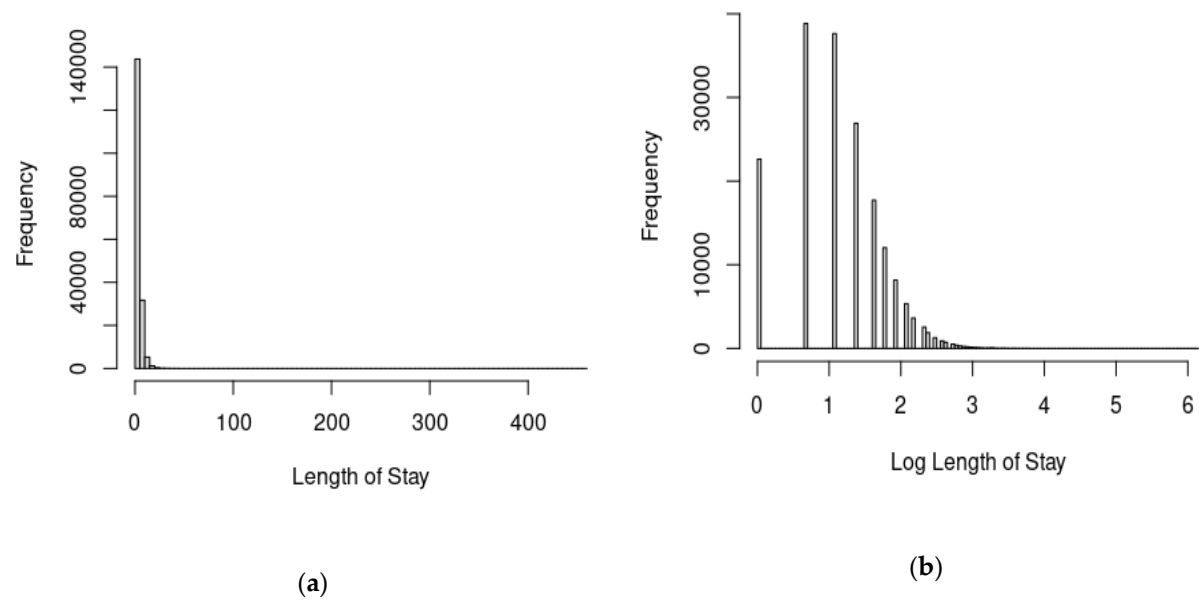

**Figure S2.** Histograms for the covariate length of stay. Panel (a) shows the distribution in original units, and panel (b) shows the log-transformed histogram.

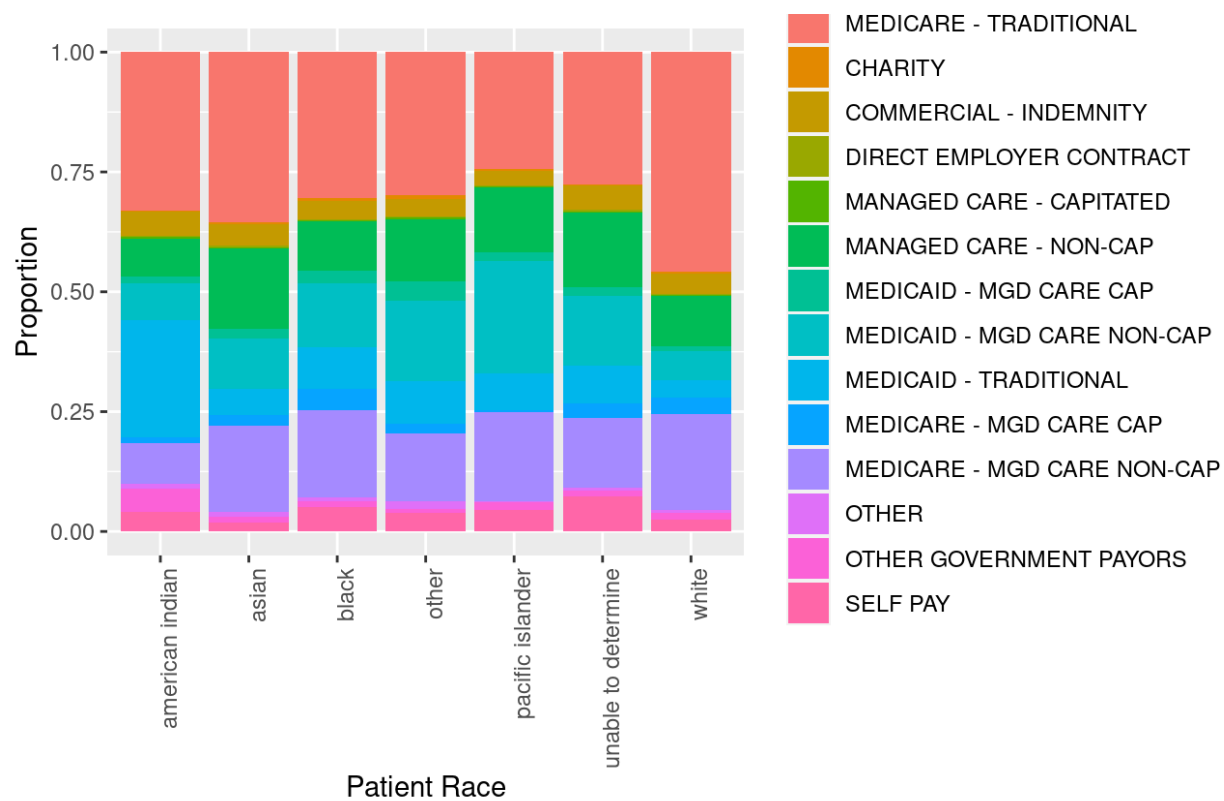

**Figure S3.** Proportion of primary payor by patient race.

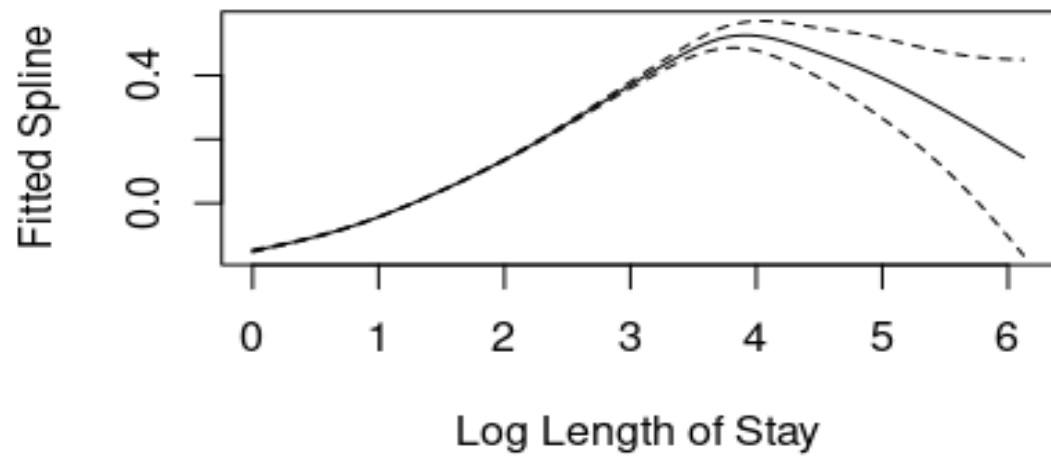

**Figure S4.** Fitted spline between the log-transformed length of stay and the expected number of additional diagnoses.

## Supplementary Materials

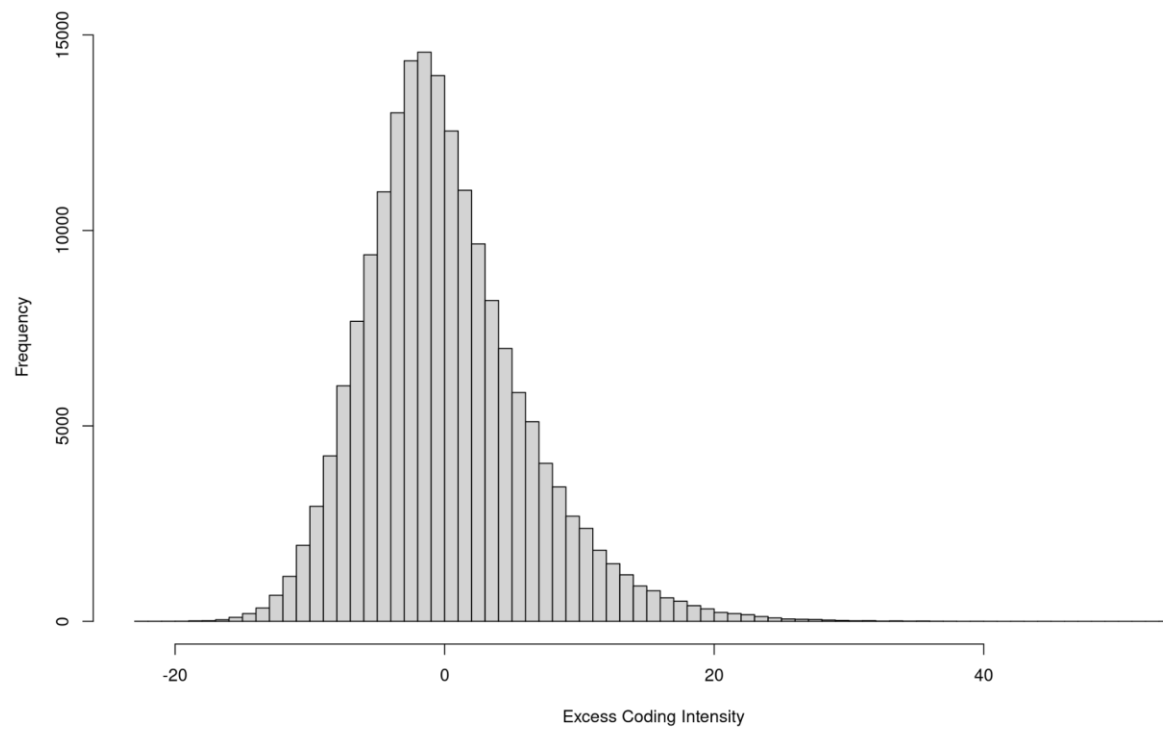

**Figure S5.** Distribution of excess coding intensity.

## Supplementary Materials

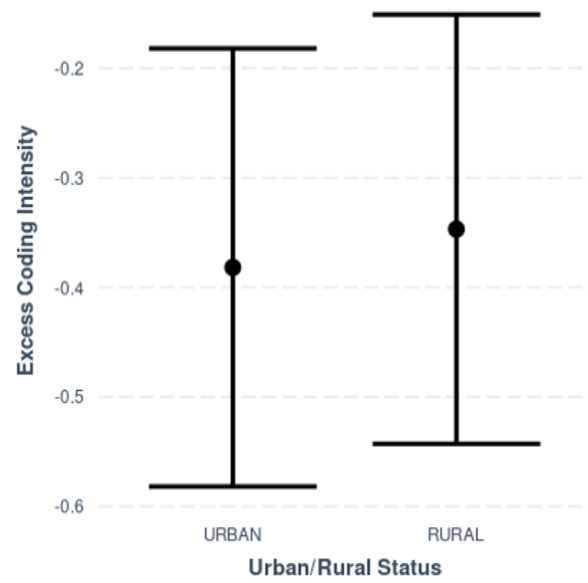

**Figure S6.** Effect plot of excess coding intensity for urban and rural facilities.

## Supplementary Materials

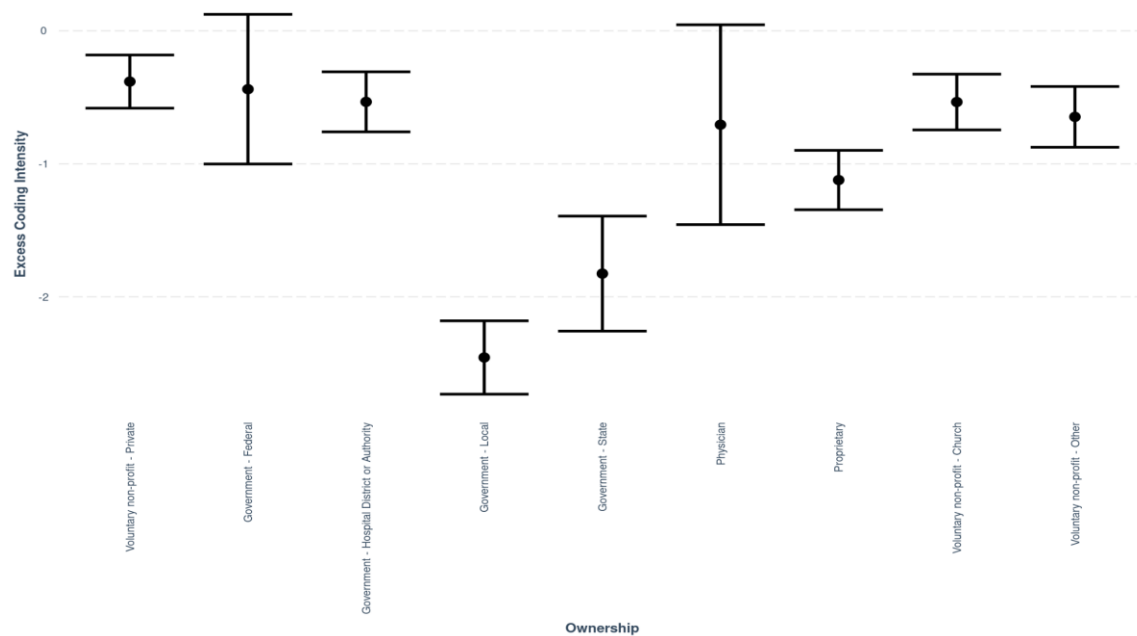

**Figure S7.** Effect plot of excess coding intensity by facility ownership status.



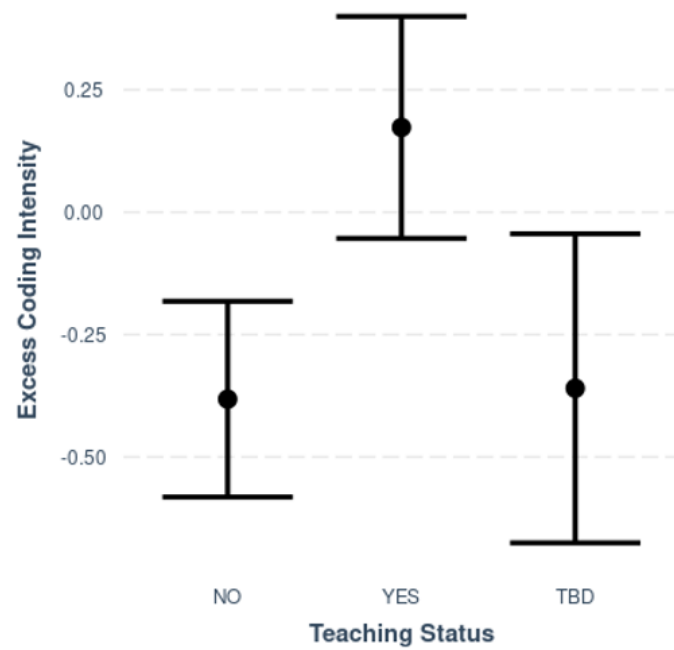

**Figure S8.** Effect plot of excess coding intensity by facility teaching status. TBD corresponds to facilities with a teaching status yet to be defined.

## Supplementary Materials

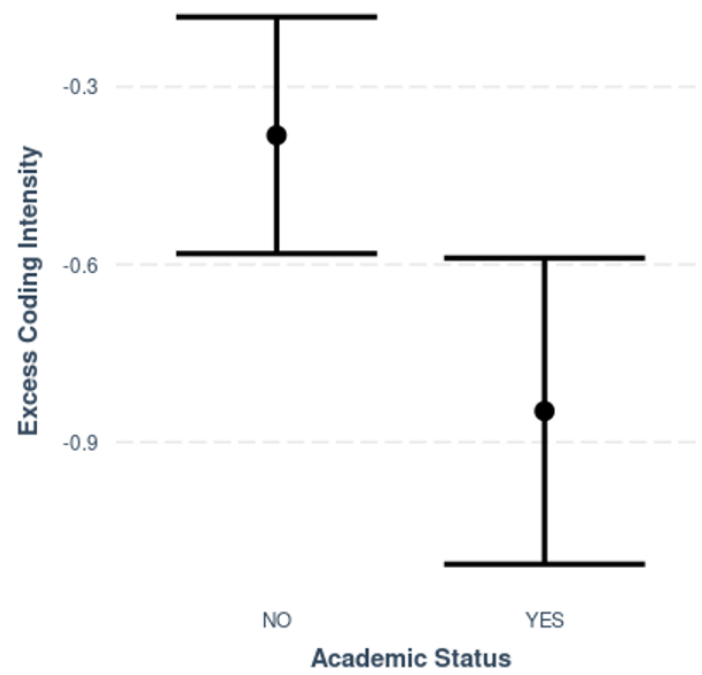

**Figure S9.** Effect plot of excess coding intensity by facility academic status.

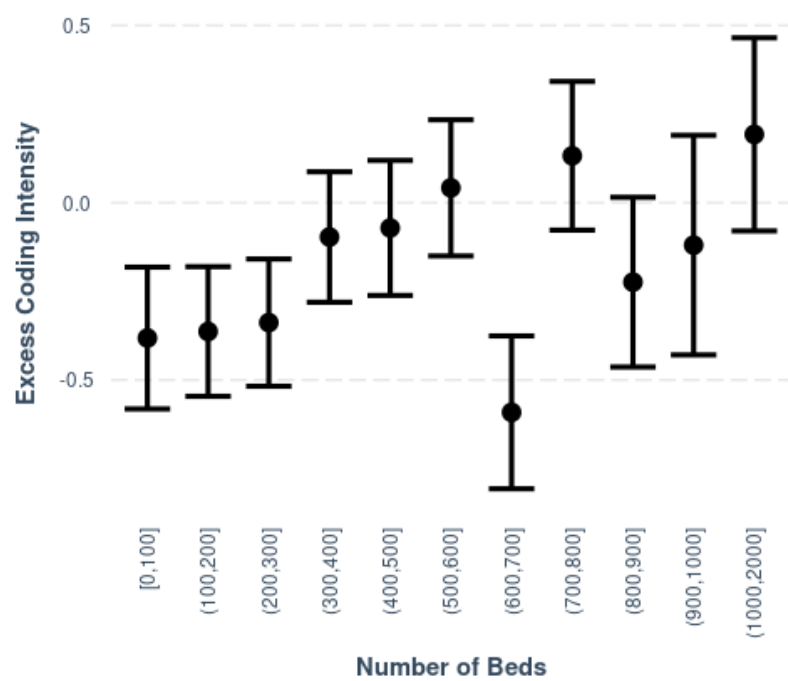

**Figure S10.** Effect plot of excess coding intensity by facility size (i.e., bed capacity).

## Supplementary Materials

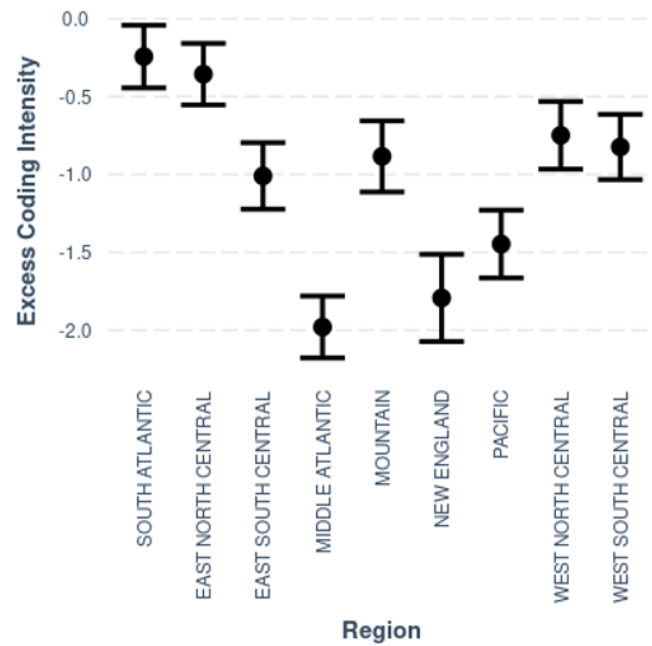

**Figure S11.** Effect plot of excess coding intensity by U.S. Census Bureau regional division.

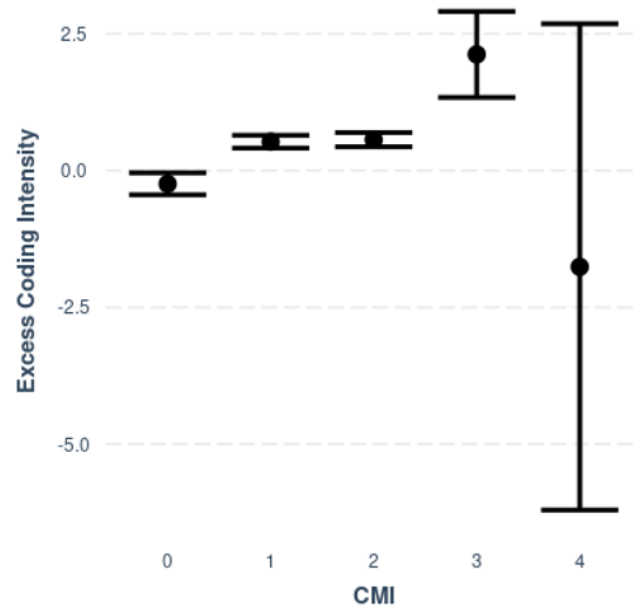

**Figure S12.** Effect plot of excess coding intensity by facility case mix index (CMI).

## Supplementary Materials

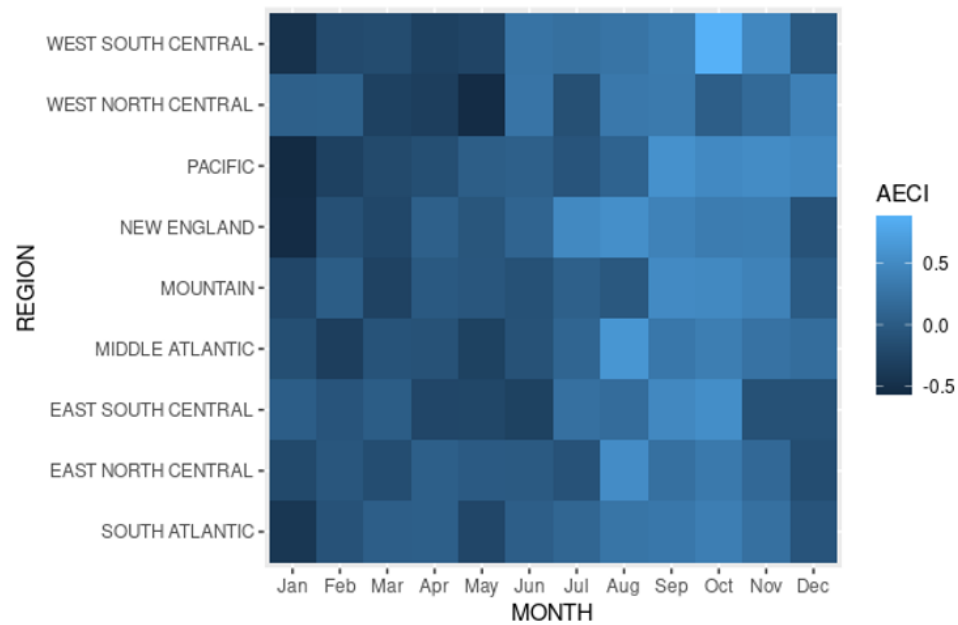

**Figure S13.** Heat map of average adjusted excess coding intensity across admission month and U.S. Census Bureau regional division.

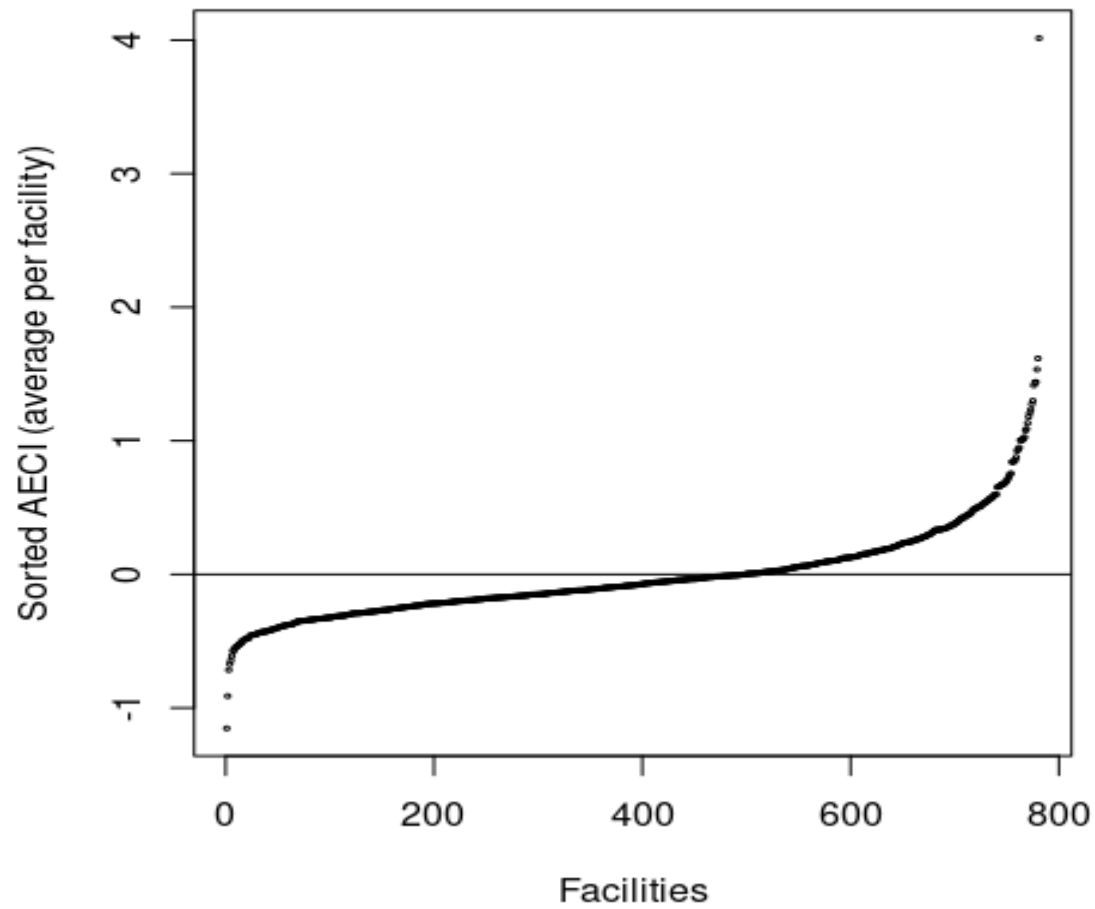

**Figure S14.** Dot plot of sorted average adjusted excess coding intensity (unexplained excess coding intensity) by facility.
